# Supplementary figures and images for: GPX4 deficiency-dependent phospholipid peroxidation drives motor deficits of ALS
Source: PubMed Central journal article supplement — J Adv Res. 2022 Mar 4;43:205–18. doi: 10.1016/j.jare.2022.02.016 (PMC9811330; doi:10.1016/j.jare.2022.02.016), 2022-03-04

**Fig. 1g**

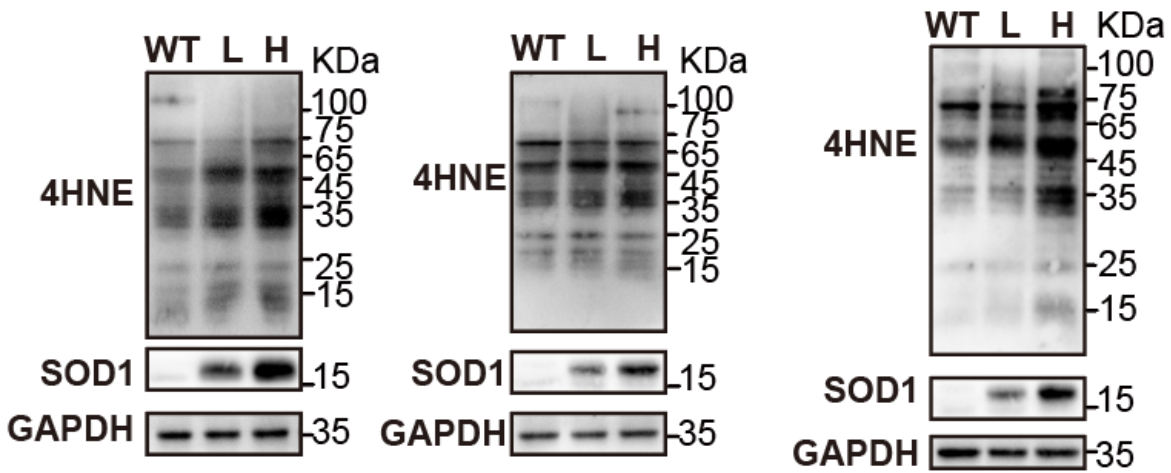

**Fig. 2f**

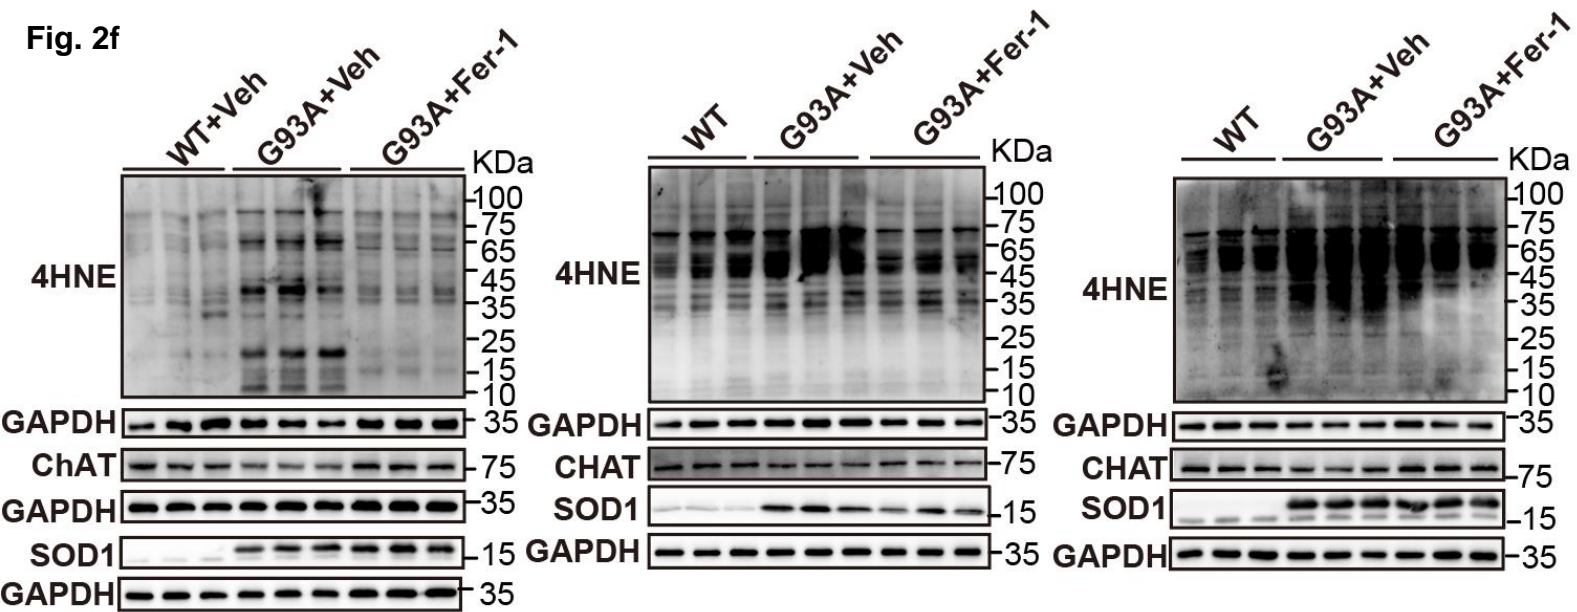

**Fig. 3f**

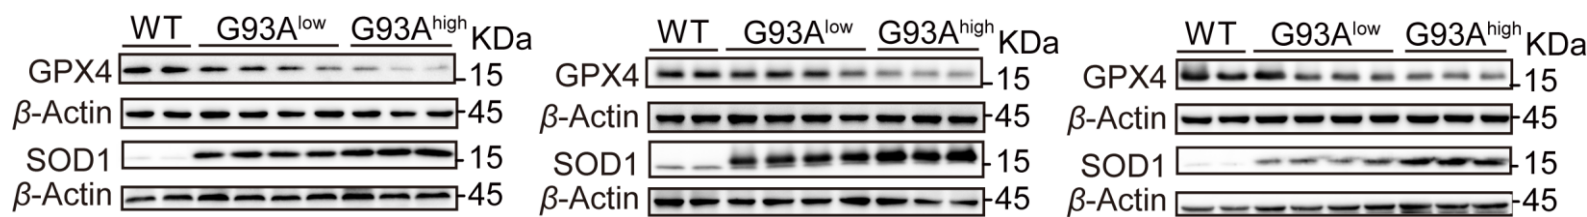

Fig. 4b

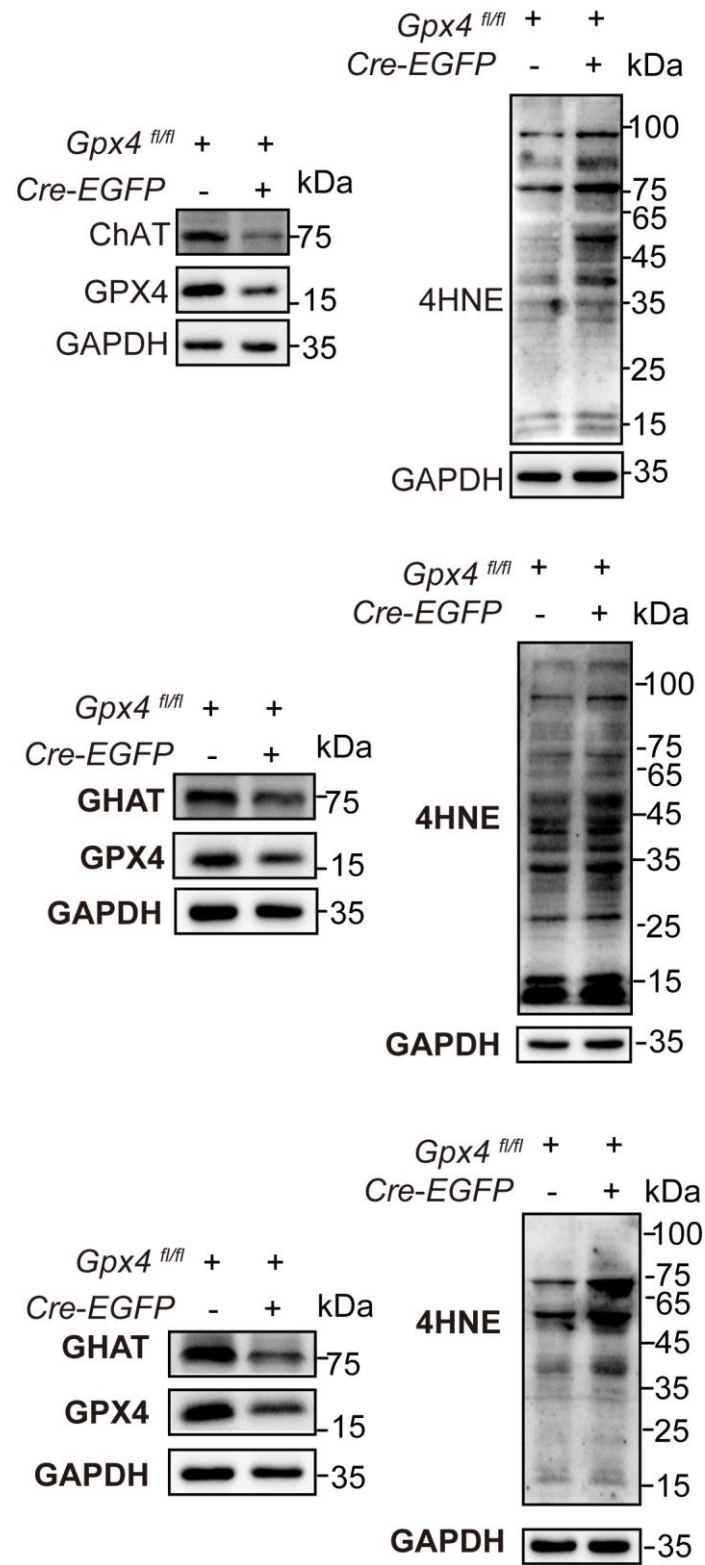

**Fig. 5b**

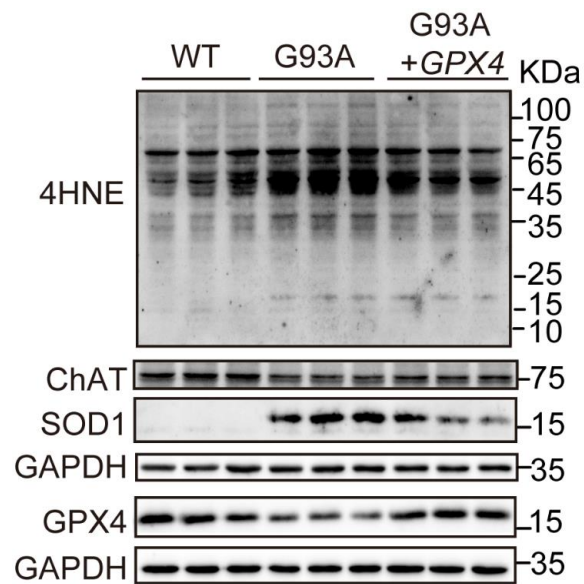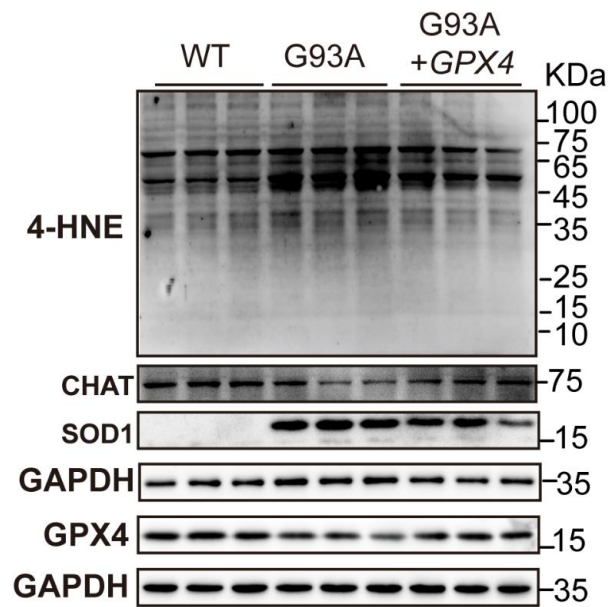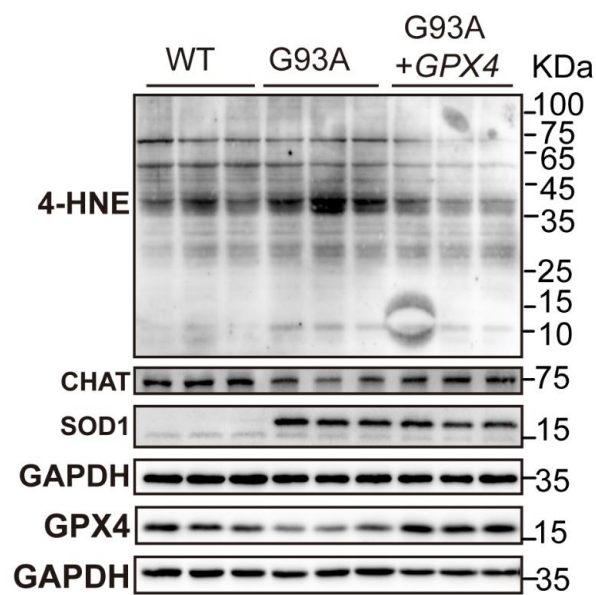

Supplement: mmc2.pdf [file mmc2.pdf]
